# Supplementary material
Source: PubMed Central journal article supplement (PMC3993659)
Supplement: JCM.03280-13_zjm999093361so1.pdf [file JCM.03280-13_zjm999093361so1.pdf]

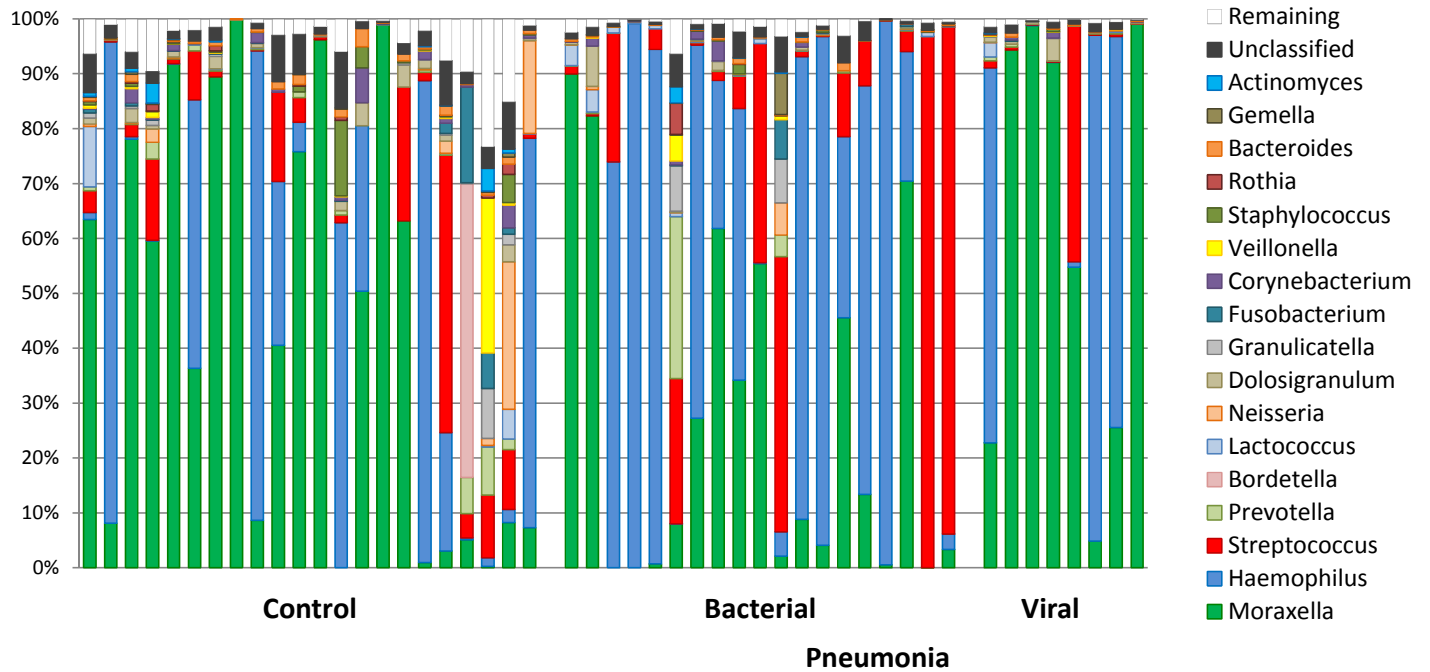

**Supplemental Figure 1.** The composition of nasopharyngeal microbiota of control children, and children with pneumonia. The genera were assigned with RDP classifier. 17 most abundant genera are displayed. Genera with < 0.5% of total number of sequences were pooled and called “Remaining”.
