# Supplementary material
Source: PubMed Central journal article supplement (PMC3993659)
Supplement: JCM.03280-13_zjm999093361so2.pdf [file JCM.03280-13_zjm999093361so2.pdf]

Supplemental Table 1. The accession numbers to RDP and Silva databases of references 16S sequences which correspond to OTUs identified in the data set, and number of sequencing reads which were assigned to a given OTU.

| <b>Accession number</b>                                                  | <b>Reference taxon</b>                                | <b>Number of reads</b> |
|--------------------------------------------------------------------------|-------------------------------------------------------|------------------------|
| S000413824, ACIL02000018,<br>ACIL02000016, ACIN02000013,<br>ACIN02000006 | <i>Abiotrophia defectiva</i> / <i>Catonella morbi</i> | 112                    |
| S000001831                                                               | <i>Achromobacter denitrificans</i>                    | 1                      |
| S000010801                                                               | <i>Acidisphaera rubrifaciens</i>                      | 1                      |
| Z93435, S000003452                                                       | <i>Acinetobacter baumannii</i> / <i>lwoffii</i>       | 15                     |
| S000539896                                                               | <i>Acinetobacter calcoaceticus</i>                    | 2                      |
| S000381585, AF311991, X81663                                             | <i>Acinetobacter johnsonii</i>                        | 19                     |
| S000002678                                                               | <i>Acinetobacter radioresistens</i>                   | 1                      |
| S000006560                                                               | <i>Actinomyces gerencseriae</i>                       | 6                      |
| S000111689                                                               | <i>Actinomyces graevenitzii</i>                       | 27                     |
| AB545934                                                                 | <i>Actinomyces massiliensis</i>                       | 1                      |
| S000010758                                                               | <i>Actinomyces meyeri</i>                             | 93                     |
| AB618790                                                                 | <i>Actinomyces naeslundii</i>                         | 8                      |
| X80504, S000015295                                                       | <i>Actinomyces odontolyticus</i>                      | 24                     |
| DQ223314, EU083529                                                       | <i>Aggregatibacter aphrophilus</i>                    | 32                     |

|                                                 |                                                   |    |
|-------------------------------------------------|---------------------------------------------------|----|
| AEPS01000017                                    | <i>Aggregatibacter segnis</i>                     | 4  |
| CP001071                                        | <i>Akkermansia muciniphila</i>                    | 4  |
| FP929032                                        | <i>Alistipes shahii</i>                           | 1  |
| S000770217                                      | <i>Alkalimonas delamerensis</i>                   | 1  |
| S000541026                                      | <i>Altererythrobacter luteolus</i>                | 1  |
| ABXA01000039                                    | <i>Anaerococcus hydrogenalis</i>                  | 1  |
| FR870442                                        | <i>Arthrobacter ilicis</i>                        | 1  |
| CP001721                                        | <i>Atopobium parvulum</i>                         | 35 |
| U49080                                          | <i>Bacillus sporothermodurans</i>                 | 1  |
| ABQL01000001, X60646                            | <i>Bacillus subtilis</i>                          | 5  |
| X55062, GU086455, S002290220,<br>Z84578, X55060 | <i>Bacillus thuringiensis/ sp./ cereus</i>        | 55 |
| AB510696                                        | <i>Bacteroides acidifaciens</i>                   | 30 |
| AB547639                                        | <i>Bacteroides coagulans</i>                      | 1  |
| ABIY02000057, EU136688                          | <i>Bacteroides coprocola</i>                      | 3  |
| ABWZ01000093                                    | <i>Bacteroides dorei</i>                          | 51 |
| EU136695                                        | <i>Bacteroides eggerthii</i>                      | 1  |
| X83935, AB510701                                | <i>Bacteroides fragilis</i>                       | 15 |
| S000964306                                      | <i>Bacteroides graminisolvens</i>                 | 1  |
| ABJL02000007, ACCH01000108                      | <i>Bacteroides intestinalis/ cellulosityticus</i> | 47 |
| AB510703                                        | <i>Bacteroides massiliensis</i>                   | 7  |
| EU136693                                        | <i>Bacteroides nordii</i>                         | 1  |

|                                                               |                                                                  |     |
|---------------------------------------------------------------|------------------------------------------------------------------|-----|
| AAXF02000050, AB510705                                        | <i>Bacteroides ovatus</i>                                        | 6   |
| EU136690, S000451793                                          | <i>Bacteroides salyersiae</i>                                    | 4   |
| AB510708, ABFZ02000022,<br>ABFZ02000021                       | <i>Bacteroides stercoris</i>                                     | 19  |
| S000628239, ABXI02000116,<br>S000628237, S000628241, AB510710 | <i>Bacteroides thetaiotaomicron/ finegoldii</i>                  | 40  |
| EU136680, AAYH02000049                                        | <i>Bacteroides uniformis</i>                                     | 62  |
| EU136687                                                      | <i>Bacteroides vulgatus</i>                                      | 8   |
| AB510713                                                      | <i>Bacteroides xylanisolvens</i>                                 | 50  |
| AB547647                                                      | <i>Barnesiella intestinhominis</i>                               | 1   |
| AF275882                                                      | <i>Bifidobacterium adolescentis</i>                              | 1   |
| CP001606                                                      | <i>Bifidobacterium animalis</i>                                  | 23  |
| U25951                                                        | <i>Bifidobacterium bifidum</i>                                   | 12  |
| ACCG02000012, GU361815                                        | <i>Bifidobacterium breve</i>                                     | 9   |
| GU361816, ABXY01000019                                        | <i>Bifidobacterium catenulatum</i>                               | 3   |
| AB116305, CP001095                                            | <i>Bifidobacterium longum</i>                                    | 20  |
| GU361827                                                      | <i>Bifidobacterium pseudocatenulatum</i>                         | 1   |
| GU361828                                                      | <i>Bifidobacterium pseudolongum</i>                              | 3   |
| S000086360                                                    | <i>Bifidobacterium scardovii</i>                                 | 4   |
| AJ430193                                                      | <i>Blastococcus aggregatus</i>                                   | 1   |
| S000388693, S000437033,<br>S000015853, S000437035             | <i>Bordetella hinzii/ holmesii/ trematum/<br/>bronchiseptica</i> | 463 |
| AM902716                                                      | <i>Bordetella petrii</i>                                         | 2   |

|                                |                                                       |    |
|--------------------------------|-------------------------------------------------------|----|
| S000251362                     | <i>Brachybacterium muris</i>                          | 1  |
| S000011551                     | <i>Brevibacterium casei</i>                           | 1  |
| S000007728                     | <i>Brevibacterium iodinum</i>                         | 1  |
| S000979829                     | <i>Brevibacterium ravensturgense</i>                  | 1  |
| L04322, S000645708             | <i>Campylobacter concisus</i>                         | 35 |
| AB595133                       | <i>Campylobacter rectus</i>                           | 1  |
| S000645697                     | <i>Campylobacter showae</i>                           | 1  |
| ACLQ01000011, S000437590       | <i>Capnocytophaga gingivalis/ granulosa</i>           | 19 |
| S000541544                     | <i>Capnocytophaga leadbetteri</i>                     | 7  |
| CP001632                       | <i>Capnocytophaga ochracea</i>                        | 3  |
| L14636, ABZV01000054           | <i>Capnocytophaga sputigena</i>                       | 13 |
| ACKY01000036                   | <i>Cardiobacterium hominis</i>                        | 2  |
| S000022009                     | <i>Cellulomonas humilata</i>                          | 1  |
| S000730508                     | <i>Chryseobacterium hominis</i>                       | 4  |
| HQ992945, S000013935, FR870445 | <i>Citrobacter koseri / Shigella flexneri/ sonnei</i> | 3  |
| AY438672                       | <i>Clostridium bartlettii</i>                         | 9  |
| AB023970                       | <i>Clostridium hiranonis</i>                          | 3  |
| S000436096                     | <i>Clostridium innocuum</i>                           | 1  |
| X77850                         | <i>Clostridium rectum</i>                             | 1  |
| CP002109                       | <i>Clostridium saccharolyticum</i>                    | 1  |
| M59112                         | <i>Clostridium symbiosum</i>                          | 2  |

|                                           |                                                                   |     |
|-------------------------------------------|-------------------------------------------------------------------|-----|
| ABEY02000028                              | <i>Coprococcus eutactus</i>                                       | 1   |
| ACGD01000048, S000128467                  | <i>Corynebacterium accolens/</i><br><i>tuberculostearicum</i>     | 20  |
| S000095332                                | <i>Corynebacterium appendicis</i>                                 | 2   |
| AY536427                                  | <i>Corynebacterium aurimucosum</i>                                | 1   |
| S000001309                                | <i>Corynebacterium durum</i>                                      | 1   |
| BA000036                                  | <i>Corynebacterium glutamicum</i>                                 | 1   |
| CP001620                                  | <i>Corynebacterium kroppenstedtii</i>                             | 3   |
| S000366401                                | <i>Corynebacterium macginleyi</i>                                 | 2   |
| ACSH02000003                              | <i>Corynebacterium matruchotii</i>                                | 1   |
| S000366399, S000260722, X81917,<br>X84258 | <i>Corynebacterium pseudodiphtheriticum/</i><br><i>propinquum</i> | 472 |
| S000367091                                | <i>Curtobacterium pusillum</i>                                    | 1   |
| AB074256                                  | <i>Delftia acidovorans</i>                                        | 8   |
| S000002714                                | <i>Dolosigranulum pigrum</i>                                      | 568 |
| AJ247212, ACEA01000028                    | <i>Eikenella corrodens</i>                                        | 3   |
| HQ651841                                  | <i>Enterobacter cloacae</i>                                       | 2   |
| Y18295                                    | <i>Enterococcus casseliflavus</i>                                 | 1   |
| Y18293, GU417251                          | <i>Enterococcus faecalis</i>                                      | 3   |
| Z96086                                    | <i>Erwinia persicina</i>                                          | 1   |
| ABYT01000002                              | <i>Eubacterium bifforme</i>                                       | 2   |
| FR749932                                  | <i>Eubacterium hadrum</i>                                         | 1   |
| CP001107                                  | <i>Eubacterium rectale</i>                                        | 1   |

|                                                                                                                                    |                                               |       |
|------------------------------------------------------------------------------------------------------------------------------------|-----------------------------------------------|-------|
| AEPW01000130, AB525414                                                                                                             | <i>Eubacterium saburreum</i>                  | 11    |
| S000128264                                                                                                                         | <i>Eubacterium sulci</i>                      | 9     |
| AAVL02000015                                                                                                                       | <i>Eubacterium ventriosum</i>                 | 4     |
| GU269551                                                                                                                           | <i>Eubacterium yurii</i>                      | 1     |
| S000650876                                                                                                                         | <i>Exiguobacterium acetylicum</i>             | 13    |
| S000504078                                                                                                                         | <i>Exiguobacterium marinum</i>                | 1     |
| S000432293                                                                                                                         | <i>Fingoldia magna</i>                        | 4     |
| S002288618, AB540989, AM887529,<br>AJ006964, AABF01000026,<br>GQ301041, GQ301040,<br>ACJY01000002, AB550231,<br>FJ196709, GQ301039 | <i>Fusobacterium nucleatum/ periodonticum</i> | 299   |
| ACDZ02000011, ACDZ02000012                                                                                                         | <i>Gemella haemolysans</i>                    | 124   |
| S000414423                                                                                                                         | <i>Gemella morbillorum</i>                    | 2     |
| S000016156                                                                                                                         | <i>Gemella sanguinis</i>                      | 7     |
| GU562446                                                                                                                           | <i>Gemmiger formicilis</i>                    | 1     |
| ACKZ01000002                                                                                                                       | <i>Granulicatella adiacens</i>                | 503   |
| ACRF01000033, S000387147                                                                                                           | <i>Granulicatella elegans</i>                 | 144   |
| S000368469, M75044, S000436254,<br>EU909672                                                                                        | <i>Haemophilus influenzae/ aegyptius</i>      | 32624 |
| AJ295746                                                                                                                           | <i>Haemophilus parahaemolyticus</i>           | 8     |
| S000368472, EU083530                                                                                                               | <i>Haemophilus parainfluenzae</i>             | 109   |
| S000436705                                                                                                                         | <i>Haemophilus paraphrohaemolyticus</i>       | 1     |

|                                                              |                                           |      |
|--------------------------------------------------------------|-------------------------------------------|------|
| S000573912                                                   | <i>Helicobacter canis</i>                 | 1    |
| FR749905                                                     | <i>Hydrogenophilus hirschii</i>           | 1    |
| S000436070                                                   | <i>Kingella denitrificans</i>             | 7    |
| ACJW02000005                                                 | <i>Kingella oralis</i>                    | 6    |
| S000008149                                                   | <i>Kocuria rhizophila</i>                 | 1    |
| AB008203                                                     | <i>Lactobacillus acidophilus</i>          | 1    |
| AB008205, AY196966, GU425024                                 | <i>Lactobacillus casei/ paracasei</i>     | 42   |
| AB008206                                                     | <i>Lactobacillus crispatus</i>            | 1    |
| AY773950, HM007590, AY773948                                 | <i>Lactobacillus delbrueckii</i>          | 8    |
| AB289099                                                     | <i>Lactobacillus equi</i>                 | 1    |
| EF468096, CP000413, S001016089                               | <i>Lactobacillus gasseri/ taiwanensis</i> | 38   |
| ACLN01000018                                                 | <i>Lactobacillus iners</i>                | 6    |
| AB326349                                                     | <i>Lactobacillus murinus</i>              | 25   |
| ACGZ02000033, D79210                                         | <i>Lactobacillus plantarum</i>            | 1    |
| EF468094, CP000705, AF429538,<br>X76328                      | <i>Lactobacillus reuteri</i>              | 36   |
| AF429476, AB626049                                           | <i>Lactobacillus rhamnosus</i>            | 92   |
| S000870727                                                   | <i>Lactobacillus ruminis</i>              | 2    |
| AY204892, S000608879                                         | <i>Lactobacillus sakei</i>                | 1    |
| AB326353                                                     | <i>Lactobacillus salivarius</i>           | 1    |
| S000389919                                                   | <i>Lactobacillus vaginalis</i>            | 1    |
| EU091472, S000439500, AB008215,<br>EF694031, M58837, M58836, | <i>Lactococcus lactis</i>                 | 1018 |

AB008214

|                               |                                            |       |
|-------------------------------|--------------------------------------------|-------|
| AEQP01000026                  | <i>Lautropia mirabilis</i>                 | 11    |
| ET631757, CP001685            | <i>Leptotrichia buccalis</i>               | 16    |
| AB558169                      | <i>Leptotrichia goodfellowii</i>           | 5     |
| AB558170                      | <i>Leptotrichia hofstadii</i>              | 3     |
| AB558171, S000434624          | <i>Leptotrichia shahii</i>                 | 6     |
| S000018119                    | <i>Leptotrichia trevisanii</i>             | 3     |
| AB588021                      | <i>Leptotrichia wadei</i>                  | 64    |
| S000382657                    | <i>Leuconostoc carnosum</i>                | 1     |
| AB271742                      | <i>Lysinibacillus sphaericus</i>           | 2     |
| S000981170                    | <i>Megamonas rupellensis</i>               | 1     |
| AB609707, S000395077          | <i>Megasphaera micronuciformis</i>         | 113   |
| CP001029                      | <i>Methylobacterium populi</i>             | 1     |
| L20849                        | <i>Methylobacterium rhodinum</i>           | 1     |
| S000539539                    | <i>Microbacterium hydrocarbonoxydans</i>   | 1     |
| CP001628.2                    | <i>Micrococcus luteus</i>                  | 4     |
| S000021364                    | <i>Mogibacterium vescum</i>                | 20    |
| X74903, U10876                | <i>Moraxella catarrhalis</i>               | 7521  |
| AF005160, X74895, S000413900, | <i>Moraxella lacunata/ nonliquefaciens</i> | 22424 |
| HM152563                      |                                            |       |
| FR822735                      | <i>Moraxella lincolnii</i>                 | 12551 |
| FR726160                      | <i>Moraxella osloensis</i>                 | 7     |



|                                     |                                         |     |
|-------------------------------------|-----------------------------------------|-----|
| S000540537                          | <i>Mucispirillum schaedleri</i>         | 5   |
| S000387267                          | <i>Mycoplasma salivarium</i>            | 67  |
| S000901783                          | <i>Naxibacter haematophilus</i>         | 1   |
| S000413195                          | <i>Neisseria bacilliformis</i>          | 13  |
| ACDY02000019                        | <i>Neisseria cinerea</i>                | 11  |
| ADBF01000003                        | <i>Neisseria elongata</i>               | 5   |
| S000414306                          | <i>Neisseria flavescens</i>             | 742 |
| X74901                              | <i>Neisseria lactamica</i>              | 1   |
| AJ247248, AJ247243,<br>ACKO02000016 | <i>Neisseria sicca/ macacae</i>         | 49  |
| AJ247249                            | <i>Neisseria subflava</i>               | 42  |
| FR749915                            | <i>Nocardia globerula</i>               | 1   |
| AB547649                            | <i>Odoribacter splanchnicus</i>         | 2   |
| S000461126                          | <i>Oribacterium sinus</i>               | 4   |
| AF373196, AB004758                  | <i>Pantoea agglomerans/ ananatis</i>    | 2   |
| EU136681, CP000140                  | <i>Parabacteroides distasonis</i>       | 26  |
| EU136697                            | <i>Parabacteroides goldsteinii</i>      | 5   |
| EU136685                            | <i>Parabacteroides merdae</i>           | 5   |
| S000414229, AEON01000002            | <i>Parascardovia denticolens</i>        | 32  |
| S001239099                          | <i>Parasutterella excrementihominis</i> | 4   |
| ABEE02000013                        | <i>Parvimonas micra</i>                 | 6   |
| S000804721                          | <i>Pedobacter duraquae</i>              | 1   |

|                                             |                                               |      |
|---------------------------------------------|-----------------------------------------------|------|
| S000634343                                  | <i>Peptostreptococcus stomatis</i>            | 4    |
| S000013701                                  | <i>Phascolarctobacterium faecium</i>          | 4    |
| FJ792537, AB547668                          | <i>Porphyromonas asaccharolytica/ uenonis</i> | 3    |
| S000996242, AB588020                        | <i>Porphyromonas bennonis</i>                 | 1    |
| AB547656                                    | <i>Porphyromonas catoniae</i>                 | 14   |
| ACNN01000021                                | <i>Porphyromonas endodontalis</i>             | 2    |
| AP009380                                    | <i>Porphyromonas gingivalis</i>               | 2    |
| AB547667                                    | <i>Porphyromonas somerae</i>                  | 3    |
| AB547671                                    | <i>Prevotella baroniae</i>                    | 1    |
| ADEG01000074                                | <i>Prevotella buccalis</i>                    | 2    |
| ACBX02000025, ACBX02000047,<br>ACBX02000017 | <i>Prevotella copri</i>                       | 22   |
| AB547677                                    | <i>Prevotella corporis</i>                    | 2    |
| AB547685                                    | <i>Prevotella histicola</i>                   | 1099 |
| AF414821                                    | <i>Prevotella intermedia</i>                  | 1    |
| AB547689                                    | <i>Prevotella loescheii</i>                   | 4    |
| S000859950                                  | <i>Prevotella maculosa</i>                    | 4    |
| CP002123, CP002122                          | <i>Prevotella melaninogenica</i>              | 701  |
| AB547692                                    | <i>Prevotella micans</i>                      | 1    |
| AB547695                                    | <i>Prevotella nanceiensis</i>                 | 60   |
| AB547697                                    | <i>Prevotella nigrescens</i>                  | 46   |
| AB547701                                    | <i>Prevotella oris</i>                        | 28   |

|                                                         |                                                                                       |     |
|---------------------------------------------------------|---------------------------------------------------------------------------------------|-----|
| AB547702                                                | <i>Prevotella oulorum</i>                                                             | 24  |
| AB547703                                                | <i>Prevotella pallens</i>                                                             | 37  |
| S000774968                                              | <i>Prevotella pleuritidis</i>                                                         | 10  |
| S000334739                                              | <i>Prevotella salivae</i>                                                             | 141 |
| S000334738                                              | <i>Prevotella shahii</i>                                                              | 1   |
| S000768322                                              | <i>Prevotella stercorea</i>                                                           | 1   |
| S001168700, ACIJ02000002                                | <i>Prevotella tanneriae</i>                                                           | 3   |
| AB547706                                                | <i>Prevotella timonensis</i>                                                          | 2   |
| EF680378, S000264635                                    | <i>Propionibacterium acnes</i>                                                        | 231 |
| S000011249                                              | <i>Propionibacterium freudenreichii</i>                                               | 1   |
| S000008182                                              | <i>Propionibacterium granulosum</i>                                                   | 5   |
| FJ652610,Z76656,FJ971871                                | <i>Pseudomonas chlororaphis/fragi</i> 98                                              | 5   |
| S000006483, Z76667, AB021409,<br>S000009281, S000516032 | <i>Pseudomonas plecoglossicida/ putida/ monteilii/ pseudoalcaligenes/ moraviensis</i> | 4   |
| S000334612                                              | <i>Rothia aeria</i>                                                                   | 4   |
| CP002280, GU416825,<br>ACVO01000020                     | <i>Rothia dentocariosa/ mucilaginoso</i>                                              | 545 |
| S000436016                                              | <i>Ruminococcus bromii</i>                                                            | 1   |
| L76604                                                  | <i>Ruminococcus torques</i>                                                           | 1   |
| AJ512945                                                | <i>Schlegelella thermodepolymerans</i>                                                | 1   |
| S000390722                                              | <i>Selenomonas infelix</i>                                                            | 1   |
| S000390719                                              | <i>Selenomonas sputigena</i>                                                          | 1   |
| AB540987, AY044916                                      | <i>Solobacterium moorei</i>                                                           | 21  |

|                                           |                                                                   |     |
|-------------------------------------------|-------------------------------------------------------------------|-----|
| S000334614                                | <i>Sphingomonas yabuuchiae</i>                                    | 1   |
| S000529044, L37597, Z26896                | <i>Staphylococcus aureus/ haemolyticus</i>                        | 124 |
| S000381982, Z26940, Z26888,<br>Z26894     | <i>Staphylococcus caprae/ capitis/ arlettae/<br/>epidermidis</i>  | 61  |
| S000413962, Z26895                        | <i>Staphylococcus cohnii/ equorum</i>                             | 3   |
| Z26905, S000016099                        | <i>Staphylococcus hominis</i>                                     | 38  |
| S000381991, S000414717                    | <i>Staphylococcus pasteurii/ warneri</i>                          | 96  |
| AJ131913, S000010261, FJ971878,<br>X95923 | <i>Stenotrophomonas maltophilia /<br/>Pseudomonas hibiscicola</i> | 175 |
| S000428928                                | <i>Streptococcus anginosus</i>                                    | 1   |
| AEQR01000024                              | <i>Streptococcus australis</i>                                    | 3   |
| AEVC01000028, AY584476                    | <i>Streptococcus cristatus</i>                                    | 28  |
| AJ420200                                  | <i>Streptococcus downei</i>                                       | 10  |
| AY485606                                  | <i>Streptococcus gordonii</i>                                     | 3   |
| ABJK02000007, S000393994                  | <i>Streptococcus infantarius</i>                                  | 2   |
| AEVD01000030                              | <i>Streptococcus infantis</i>                                     | 38  |
| Z69040, Z69041, AB236926                  | <i>Streptococcus intermedius/ constellatus</i>                    | 198 |
| AJ243965                                  | <i>Streptococcus mutans</i>                                       | 11  |
| GU045377, AF003932                        | <i>Streptococcus oralis</i>                                       | 9   |
| EU156771, ADVN01000004,<br>AY485605       | <i>Streptococcus parasanguinis</i>                                | 109 |
| EU156772, AEVF01000016                    | <i>Streptococcus peroris</i>                                      | 35  |

|                                                                                                                       |                                                                       |       |
|-----------------------------------------------------------------------------------------------------------------------|-----------------------------------------------------------------------|-------|
| GU045394, GU326244, S000386901,<br>S000386902, AY485600, GU399444,<br>AJ001246, S000421498                            | <i>Streptococcus pneumoniae/</i><br><i>pseudopneumoniae/ mitis</i>    | 11864 |
| X68418, S000400852,<br>AEVI01000085, S000400850                                                                       | <i>Streptococcus salivarius/ thermophilus/</i><br><i>vestibularis</i> | 615   |
| S000386900, DQ303192, AB596946                                                                                        | <i>Streptococcus sanguinis</i>                                        | 37    |
| AJ243966                                                                                                              | <i>Streptococcus sobrinus</i>                                         | 1     |
| ACBY02000023                                                                                                          | <i>Subdoligranulum variabile</i>                                      | 1     |
| CP002171                                                                                                              | <i>Thermoanaerobacterium</i><br><i>thermosaccharolyticum</i>          | 1     |
| S000435847                                                                                                            | <i>Treponema medium</i>                                               | 1     |
| S000381264                                                                                                            | <i>Turicella otitidis</i>                                             | 1     |
| S000392070                                                                                                            | <i>Turicibacter sanguinis</i>                                         | 1     |
| ACIK02000020, HM007566,<br>AY995769, X84006, X84005,<br>ADFU01000009, ACIK02000004,<br>X84007, ACIK02000021, CP001820 | <i>Veillonella dispar/ parvula/ atypica</i>                           | 494   |
| S000380997                                                                                                            | <i>Weissella hellenica</i>                                            | 1     |
| S000403225                                                                                                            | <i>Yaniella halotolerans</i>                                          | 1     |
